# Supplementary material for: Static and dynamic magnetization control of extrinsic multiferroics by the converse magneto-photostrictive effect.
Source: Research Square preprint supplement (doi:10.21203/rs.3.rs-3131114/v1), 2023-08-04
Supplement: Supplementary file 1 [file a1ea4c33d27b8f095cb398c2.pdf]

**Supplementary information for "Static and dynamic  
magnetization control of extrinsic multiferroics by the converse  
magneto-photostrictive effect."**

Matthieu Liparo,<sup>1,2</sup> Jean-Philippe Jay,<sup>1</sup> Matthieu Dubreuil,<sup>1</sup> Gaëlle  
Simon,<sup>3</sup> Alain Fessant,<sup>1</sup> Walaa Jahjah,<sup>1</sup> Yann Le Grand,<sup>1</sup> Charles  
Sheppard,<sup>2</sup> Aletta R. E. Prinsloo,<sup>2</sup> Vincent Vlamincq,<sup>4</sup> Vincent Castel,<sup>4</sup> Loic  
Temdie-Kom,<sup>4</sup> Guillaume Bourcin,<sup>4</sup> David Spenato,<sup>1</sup> and David T. Dekadjevi<sup>1,2</sup>

<sup>1</sup>*Univ. Brest, Laboratoire d'Optique et de Magnétisme  
(OPTIMAG), EA 938, 29200 Brest, France*

<sup>2</sup>*Cr Research Group, Department of Physics, University of Johannesburg,  
PO Box 524, Auckland Park 2006, South Africa*

<sup>3</sup>*Univ. Brest, Service général des plateformes technologiques,  
Service RMN-RPE, 29200 Brest, France*

<sup>4</sup>*IMT-Atlantique, Campus de Brest,  
Département Micro-Ondes, Technopole Brest-Iroise,  
CS83818, 29238 Brest Cedex 03, France*

(Dated: July 1, 2023)

Figure S1 shows a scheme of the experimental set-up for static measurements.

18

19

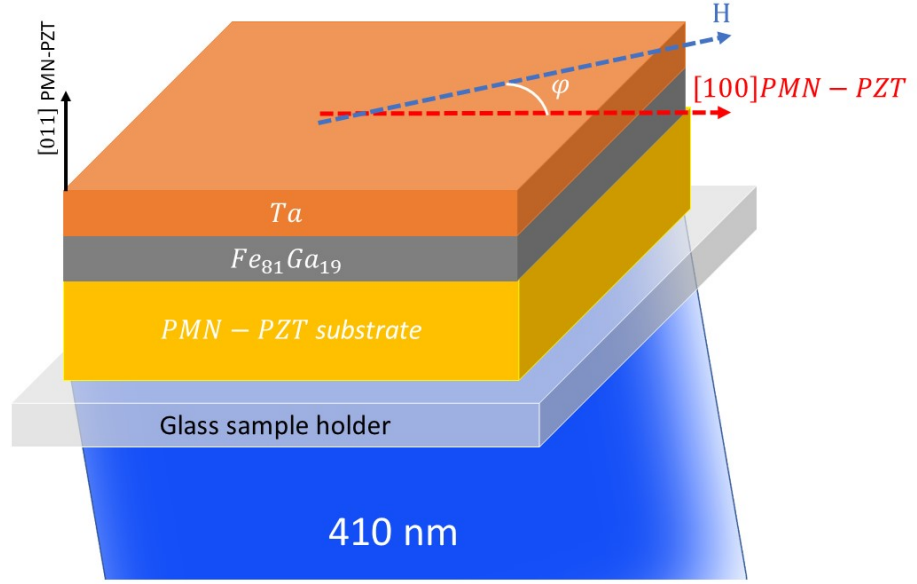

Figure S 1. Schematic drawing of the ME composite consisting of the magnetostrictive FeGa and the (011)-oriented PMN-PZT substrate. The configuration of measurement is also indicated using  $\varphi$ , the angle between the applied magnetic field  $H$  (dashed blue axis) and the  $[100]$  direction of the substrate (dashed red axis).

Figure S2 (a) and (b) show the entire M-H loops which were zoomed to obtain Figure 1(a) and (b) of the manuscript.

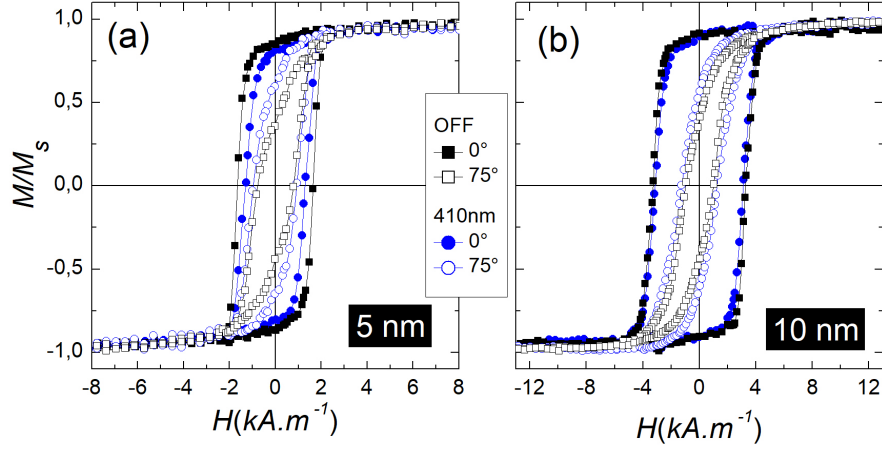

Figure S 2. The entire MH loops of the normalized magnetization reversal of the Ta(10 nm)/FeGa(5 nm ; 10 nm)/PMN-PZT(0.3 mm), measured in-plane with the magnetic field  $H$  respectively parallel to  $[100]$  ( $\varphi = 0^\circ$ , i.e. along the deposition field axis  $H_{\text{dep}}$ ) and  $\varphi = 75^\circ$ , under MPE (i.e. under illumination at 410nm) and in the dark state (OFF) materials.

Figure S3 shows the time evolution of M-H loops under sample illumination for the 10 nm FeGa sample at  $\varphi = 0^\circ$ . The illumination started at  $t = 0$  s and a delay time of 45 s was set before starting the first M-H loop measurement. Each M-H loop took 150 s to be obtained. (In the manuscript, a given MH loop corresponds to the average of 5 MH loops. Thus, it took  $5 \times 150$  s = 750 s to record each M-H loop presented in the manuscript).

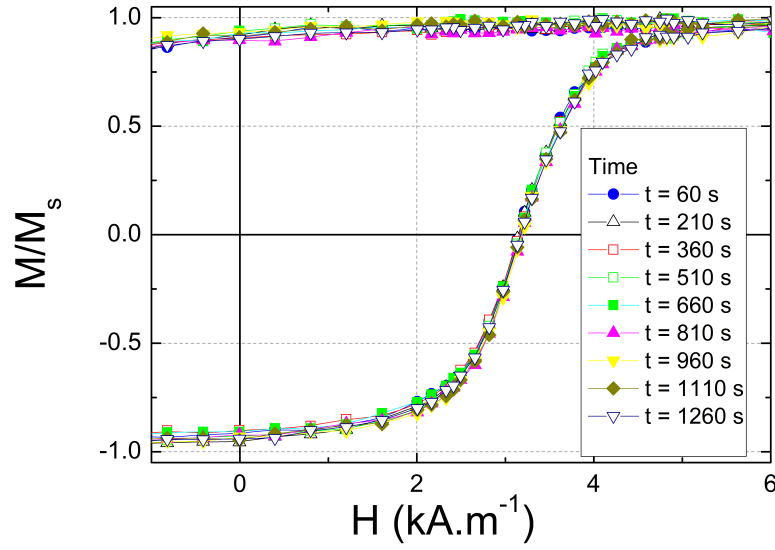

Figure S 3. Time evolution under sample illumination of the M-H loops for the 10 nm FeGa sample at  $\varphi = 0^\circ$ , zoomed in-between  $H = -1 \text{ kA.m}^{-1}$  and  $6 \text{ kA.m}^{-1}$

28 Figure S4 shows the time evolution of temperature changes probed at the sample surface  
29 when the material is illuminated by the laser. The illumination started at  $t = 0$  s. The  
30 measurement was performed with an infrared thermometer.

31

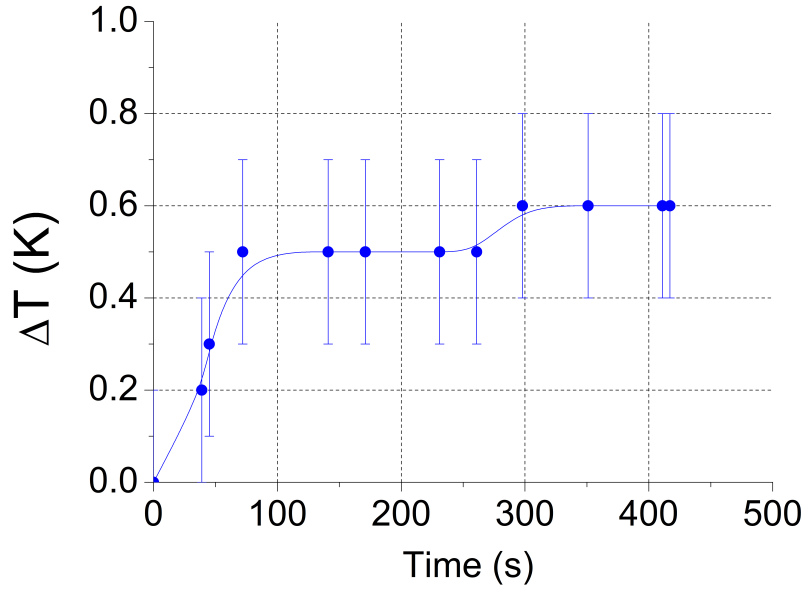

Figure S 4. Time evolution of temperature changes probed at the sample surface under laser illumination.

Figure S5 shows the time evolution of the temperature and of the resonance field for the 5 nm sample along  $\varphi = 0^\circ$ . The LED illumination began at  $t=125$ s (i.e. LED ON) and finished at  $t=1836$ s (i.e. LED OFF).

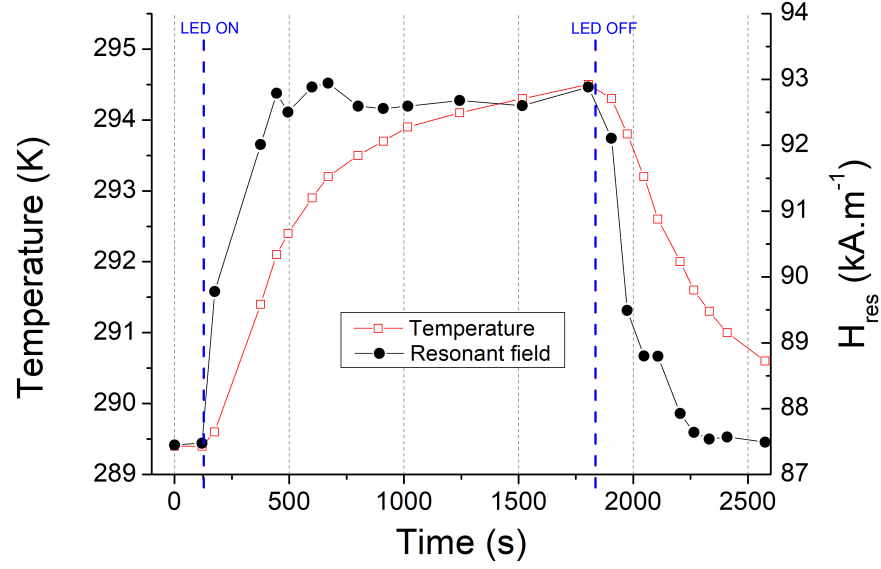

Figure S 5. Time evolution of the temperature and of the resonance field for the 5 nm sample along  $\varphi = 0^\circ$ .
